# Supplementary material for: Association between Gene Promoter Methylation and Cervical Cancer Development: Global Distribution and A Meta-analysis
Source: Oxford University Press journal article supplement (doi:10.1158/1055-9965.epi-20-0833), 2021-01-13
Supplement: 10559965epi200833-sup-244344_2_supp_6799964_qlp7p6.xlsx [file 10559965epi200833-sup-244344_2_supp_6799964_qlp7p6.xlsx]

## Sheet: Supplementary table 18
Association between gene promoter methylation and cervical cancer development: global distribution and a meta-analysis
Aissam El Aliani, Hassan El Abid, Yassine El Mallali, Mohammed Attaleb, Moulay Mustapha Ennaji, Mohammed El Mzibri.
P16
		Comparison	Studies (N)	Methylation	Specimens (N)	C	C TOTAL	Heterogeneity I²(%)
		LSIL
		Total	10	66	368	62	602	19.11
		Asian	6	27	165	54	498
		Caucasian	4	39	203	8	104
		African
		HSIL
		Total	10	146	487	62	602	6.08
		Asian	6	75	232	54	498
		Caucasian	4	71	255	8	104
		African
		CC
		Total	21	390	1141	78	1158	53.05
		Asian	13	261	766	59	817
		Caucasian	6	112	269	14	190
		African	2	17	106	5	151
CDH1
		Comparison	Studies (N)	Methylation	Specimens (N)	C	C TOTAL	Heterogeneity I2(%)
		LSIL
		Total	9	53	304	58	639	17.71
		Asian	4	10	145	19	480
		Caucasian	5	43	159	39	159
		African
		HSIL
		Total	9	133	471	57	616	44.36
		Asian	3	24	173	18	445
		Caucasian	6	109	298	39	171
		African
		CC
		Total	21	427	917	105	907	66.51
		Asian	11	279	622	60	655
		Caucasian	8	133	247	39	198
		African	2	15	48	6	54
APC
		Comparison	Studies (N)	Methylation	Specimens (N)	C	C TOTAL	Heterogeneity I2(%)2
		LSIL
		Total	1	5	20	8	20	N
		Asian
		Caucasian	1	5	20	8	20	N
		African
		HSIL	1	5	20	8	20	N
		Total
		Asian
		Caucasian	1	5	20	8	20	N
		African
		CC
		Total	7	132	441	71	620	46.29
		Asian	2	30	135	0	41
		Caucasian	4	74	218	28	88
		African	1	28	88	47	131
MGMT
		Comparison	Studies (N)	Methylation	Specimens (N)	C	C TOTAL	Heterogeneity I2(%)2
		LSIL
		Total	6	114	346	50	233	42.25
		Asian	3	26	96	25	109
		Caucasian	3	88	250	25	124
		African
		HSIL
		Total	6	144	410	50	233	56.73
		Asian	3	70	190	25	109
		Caucasian	3	74	220	25	124
		African
		CC
		Total	15	366	1145	190	938	68.04
		Asian	8	281	785	154	610
		Caucasian	6	75	270	33	188
		African	1	10	90	3	140
HMLH1
		Comparison	Studies (N)	Methylation	Specimens (N)	C	C TOTAL	Heterogeneity I2(%)2
		LSIL
		Total	5	37	281	19	180	0
		Asian	1	0	32	0	41
		Caucasian	4	37	249	19	139
		African
		HSIL
		Total	5	39	310	19	180	0
		Asian	1	1	67	0	41
		Caucasian	4	38	243	19	139
		African
		CC
		Total	9	20	441	19	360	4.72
		Asian	2	2	151	0	58
		Caucasian	6	17	200	19	165
		African	1	1	90	0	137
HIC1
		Comparison	Studies (N)	Methylation	Specimens (N)	C	C TOTAL	Heterogeneity I2(%)2
		LSIL
		Total	4	58	151	58	151	21.4
		Asian	2	24	59	24	59
		Caucasian	2	34	92	34	92
		African
		HSIL
		Total	3	99	241	99	241	78.32
		Asian	1	40	67	40	67
		Caucasian	2	59	174	59	174
		African
		CC
		Total	8	170	404	122	336	53.78
		Asian	3	79	160	83	100
		Caucasian	4	35	165	27	107
		African	1	56	79	12	129
RASSF1A
		Comparison	Studies (N)	Methylation	Specimens (N)	C	C total	Heterogeneity I2(%)2
		LSIL
		Total	5	13	143	3	131	0
		Asian	3	5	117	2	105
		Caucasian	2	8	26	1	26
		African
		HSIL
		Total	6	60	315	3	139	0
		Asian	4	41	193	2	113
		Caucasian	2	19	122	1	26
		African
		CC
		Total	27	431	1775	25	997	64.35
		Asian	19	346	1341	15	739
		Caucasian	7	84	346	7	142
		African	1	1	88	3	116
RAR BETA
		Comparison	Studies (N)	Methylation	Specimens (N)	C	C TOTAL	Heterogeneity I2(%)2
		LSIL
		Total	9	88	314	79	579	76.41
		Asian	4	40	161	33	435
		Caucasian	4	48	144	45	128
		African	1	0	9	1	16
		HSIL
		Total	8	130	466	75	544	58.49
		Asian	3	61	224	29	400
		Caucasian	4	68	217	45	128
		African	1	1	25	1	16
		CC
		Total	15	427	971	224	1126	73.63
		Asian	6	256	527	174	808
		Caucasian	7	112	292	45	177
		African	2	59	152	5	141
DAPK1
		Comparison	Studies (N)	Methylation	Specimens (N)	C	CN	Heterogeneity I2(%)2
		LSIL
		Total	11	103	428	63	351	0
		Asian	4	42	128	27	134
		Caucasian	5	57	279	35	193
		African	2	4	21	1	24
		HSIL
		Total	13	277	879	63	383	61.70
		Asian	5	131	301	27	154
		Caucasian	6	131	497	35	205
		African	2	15	41	1	24
		CC
		Total	26	1066	1836	233	1180	86.03
		Asian	12	596	1011	192	706
		Caucasian	11	397	657	37	310
		African	3	91	168	4	164
FHIT
		Comparison	Studies (N)	Methylation	Specimens (N)	C	C TOTAL	Heterogeneity I2(%)2
		LSIL
		Total	3	20	164	8	210	0
		Asian	2	19	127	8	188
		Caucasian	1	1	37	0	22
		African
		HSIL
		Total	4	32	243	11	319	30.53
		Asian	3	32	226	11	297
		Caucasian	1	0	17	0	22
		African
		CC
		Total	15	328	980	38	679	52.84
		Asian	4	15	173	33	468
		Caucasian	10	306	717	0	71
		African	1	7	90	5	140
CADM1
		Comparison	Studies (N)	Methylation	Specimens (N)	C	C TOTAL	Heterogeneity I2(%)2
		LSIL
		Total	9	44	234	24	285	51.37
		Asian	3	9	114	5	66
		Caucasian	6	35	120	19	219
		African
		HSIL
		Total	9	101	377	24	285	42.95
		Asian	3	27	131	5	66
		Caucasian	6	74	246	19	219
		African
		CC
		Total	9	197	339	24	285	51.05
		Asian	3	41	117	5	66
		Caucasian	6	156	222	19	219
		African
MAL
		Comparison	Studies (N)	Methylation	Specimens (N)	C	C TOTAL	Heterogeneity I2(%)2
		LSIL
		Total	6	18	209	16	225	17.93
		Asian	2	3	88	5	56
		Caucasian	4	15	121	11	169
		African
		HSIL
		Total	6	72	249	16	225	77.52
		Asian	2	2	96	5	56
		Caucasian	4	70	153	11	169
		African
		CC
		Total	6	181	253	16	225	62.37
		Asian	2	38	96	5	56
		Caucasian	4	143	157	11	169
		African
CCNA1
		Comparison	Studies (N)	Methylation	Specimens (N)	C	C TOTAL	Heterogeneity I2(%)2
		LSIL
		Total	5	15	117	6	155	0
		Asian	3	2	57	1	95
		Caucasian	2	13	60	5	60
		African
		HSIL
		Total	5	59	162	6	155	77.07
		Asian	3	20	101	1	95
		Caucasian	2	39	61	5	60
		African
		CC
		Total	7	212	287	18	278	43.30
		Asian	3	88	100	1	95
		Caucasian	4	124	187	17	183
		African
PAX1
		Comparison	Studies (N)	Methylation	Specimens (N)	C	C TOTAL	Heterogeneity I2(%)2
		LSIL
		Total	7	22	308	23	314	0
		Asian	7	22	308	23	314
		Caucasian
		African
		HSIL
		Total	7	101	295	23	314	57.91
		Asian	7	101	295	23	314
		Caucasian
		African
		CC
		Total	8	219	271	23	355	65.40
		Asian	8	219	271	23	355
		Caucasian
		African
